# Supplementary material for: Electron-phonon coupling in amphiboles contributes to the anomalous conductivity in subduction zones
Source: Research Square preprint supplement (doi:10.21203/rs.3.rs-1696117/v1), 2022-06-01
Supplement: Supplementary file 1 [file 9cf669d05c01f40055a5a6f8.docx]

**Table 2** Summary of experimental runs in **c** || Ei scattering geometry. Temperatures are given Kelvins and in bold (on heating) or in italic (on cooling).

| atmosphere | |
| --- | --- |
| air | N2 |
| **300**, **350**, **400**, **450**, **500**, **550**, **600**, **650**, **700**, **725**, *600*, *500*, *400*, *300* | **300**, **400**, **500**, **600**, **650**, **700**, **725**, *600*, *500*, *300* |
