# Supplementary material for: Electron-phonon coupling in amphiboles contributes to the anomalous conductivity in subduction zones
Source: Research Square preprint supplement (doi:10.21203/rs.3.rs-1696117/v1), 2022-06-01
Supplement: Supplementary file 2 [file ad5d72fbba2f4c0d0c69cf6b.docx]

**Table 1** Characteristic temperatures derived from Raman-scattering data collected in air.

| T' = 500K | ● minimum of the from the **c** || **E***i* spectra |
| --- | --- |
| T'' = 650K | ● minimum of the from the **c** ⊥ **E***i* spectraa |
| ● drop in the intensity of the M(1,3)Fe2+O6 and OH stretching modes in the **c** ⊥ **E***i* spectraa |
| ●RRS in the **c** || **E***i* spectra |
| T''' ~ 900K | ● dehydrogenation of the entire crystal bulka |

a Data from Della Ventura et al. (2018)11
